# Supplementary material
Source: PubMed Central journal article supplement (PMC7336543)
Supplement: mic-160-671-s001.pdf [file mic-160-671-s001.pdf]

## **SUPPLEMENTARY MATERIAL**

### **The role of *Lactobacillus reuteri* Cell and Mucus Binding protein A (CmbA) in adhesion to intestinal epithelial cells and mucus *in vitro***

Hanne Jensen, Stefan Roos, Hans Jonsson, Ida Rud, Stine Grimmer, Jan-Peter van Pijkeren,

Robert A. Britton, Lars Axelsson\*

Journal: Microbiology

\* Corresponding author

Address: Nofima - Norwegian Institute of Food, Fisheries, and Aquaculture Research, P.O.

Box 210, NO-1431 Ås, Norway

Email: lars.axelsson@nofima.no

## Supplementary material, Figure S1

aaggataattctaaaggctcacttgggaataattgatcatttacaggcggtaaagtagaat  
gaaagtgttaaaaaataaattttgttttaaatTTtaaggcttgtatttaggaggggttaata

1 ATG**C**TATCAAGAAAAAATTATAAGGAAACTATACGAAAAACAGACACCTACAAAAACAGTAC 60  
 1 M L S R K N Y K E T I R K Q T P T K Q Y 20

61 TATACTATTAAGAAATTA**A**CTGTTGGGGTTACTTCGGTATTAATTGGTCTATCCTTTATG 120  
 21 **Y T I K K** L T V **G** V T **S** V L I G L S F M 40  
*YSIRK-G/S type signal sequence*

121 GGAGAACTAGAAGGGGATAGCGTTCATGCGGACACGATGACAGCAAGCAGTGAGTCAACA 180  
 41 G E L E G D S V H A D T M T A S S E S T 60  
*cleavage* ↑

181 AGTGTTCAGTCGACGACTGCTCAGGATGGTTTTAAAAAATCTCCACA**A**CTCTATTTGCAA 240  
 61 S V T S T T A Q D G L K K S P Q L Y L Q 80

241 GTTACTGATACAAATAACCCAAGTACACCATTAAGTGCTTCATCCACAGGGACTAGTAAG 300  
 81 V T D T N N P S T P L S A S S T G T S K 100

301 AATGTTACCTCATCAGCTGCGGTACAAGTGAAGTCCGCTAGTGATGAAGAAGATAGTGAT 360  
 101 N V T S S A A V Q V K S A S D E E D S D 120

361 TCTACACTAGCTAAGGGAGAAAAATAAATTTGCTCGGTCAGCAGTAAAAGATTCAGTCACT 420  
 121 S T L A K G E N K F A R S A V K D S V T 140

421 GATGGGAAAACAAGTACAGCAGAAATTAATCCGGCAAAAATTAAGCAGTCCTGCTTTAATA 480  
 141 D G K T S T A E I N P A K L S S P A L I 160

481 ACGCAACTCAACCAATCCTTAGCTAAGAGCAGTACGAGTGATGCAGCAAAAAGCTAATGAT 540  
 161 T Q L N Q S L A K S S T S D A A K A N D 180

541 GAGTTAGAAATTAAGCAACAGATCCGACTAATTATCCAAACTGTGGCGATGTGTATGGG 600  
 181 E L E I K A T D P T N Y P N C G D V Y G 200

601 CCATTATTTGAATTGGATGCTAGCGGACAGCTTGTTAATAAAGATGAAGTTATATCTCTT 660  
 201 P L F E L D A S G Q L V N K D E V I S L 220

661 AAAGATATGTATATTTTCCAAATATTGAAATTAGTAAATACAAAAGATAGTGACTTTCAA 720  
 221 K D M Y I F Q I L K L V N T K D S D F Q 240

721 TATGTAATATTAACAATGAATCGTAAAGATACTGCAGATAGGTCTGTATATCTTTTTGTA 780  
 241 Y V I L T M N R K D T A D R S V Y L F V 260

781 ACTGGAAGCAATTATAGTAATGCTGTTGTTGTTAAAGTAAAGCCAAATGATACTTATGAA 840  
 261 T G S N Y S N A V V V K V K P N D T Y E 280

841 TTAAGTAAA**A**CTGGATATAGTGTTACTTATACAGAACCAACA**A**CTATAAATGGACATTAT 900  
 281 L S K T G Y S V T Y T E P T T I N G H Y 300

901 GTTGATGGA**A**CTTTTTTATGTTACAGGAAGTACTTACGATGATGGTTTTATAATGCCAGAT 960  
 301 V D G T F Y V T G S T Y D D G F I M P D 320

961 TGGCAACTGCAGCACCTTCAGATTATATATAGTTTAGGAAAT**T**ATGATCCAAGCA**A**CTACT 1020  
 321 W Q L Q H L Q I I Y S L G N Y D P S N T 340

1021 GACGCAACATCAGTTTGTGAAATAATGCCAAGTTATGAAAAGGTACCGGTAATTAATAT 1080  
 341 D A T S V C E I M P S Y E K V P V I K Y 360

1081 AGTGGAGTACCTTCAAATATTAGCCAACCTAAGGTTTACATTACCGGGTTTACCGGGTCAA 1140  
 361 S G V P S N I S Q P K V Y I T G F T G Q 380

1141 GAGTTTAA**C**GTTCAGATATTATTAACAATTATAAGAAAGTTTTTAAAGGGCTACTATCTT 1200  
 381 E F N V T D I I N N Y K K V F K G Y Y L 400

1201 CAAAATCCTAATGTGGCGTCC**C**ATGGGAACCTCTTTCCCAATTTGAGAATGGTGGTTATTAC 1260  
 401 Q N P N V A S M G T L S Q F E N G G Y Y 420

1261 TTAAAGACATATTATGATAATGATGGTAATGTTGACTTTAAGGGCTTGTATCATCAAATT 1320  
 421 L K T Y Y D N D G N V D F K G L Y H Q I 440

1321 GATGATCAGGGAACAATGAGTGTGAGTGTCTTAATGCAGATAATAAAACAATTGTTGGA 1380  
 441 D D Q G T M S V S V L N A D N K T I V G 460

1381 CCTGAAAATATTCTTGCTGGTAAATCGCATAACTTTAACTTTAATGGTCATAACTGGATT 1440  
 461 P E N I L A G K S H N F N F N G H N W I 480

1441 GCGCGGAATCCTTATGTCACTAGTTCAGCTCACGAAGTCATATTAAGTATGCTAAGTTA 1500  
 481 A R N P Y V T S S A H E V I L K Y A K L 500

1501 GGTTCAAGTTATTCTGTTGATGAAAACGGAAATAAAATAAACGATGGATGGCAATATGTT 1560  
 501 G S V I P V D E N G N K I N D G W Q Y V 520

1561 AATGATCCAGATGATGCTTCCAAAGCCACTAGCCCATATGAAAAAGCGCCAGTTATCGAT 1620  
 521 N D P D D A S K A T S P Y E K A P V I D 540

1621 GGTTATGTAGCTGTAAATCCAGATGAAACGATCGTTCCTTCTCATAACTTAAGTAGTGAC 1680  
 541 G Y V A V N P D E T I V L P H N L S S D 560

1681 ACAAAGATTTATTACCGAAAGAGGATTAAAGTTACCTATAGTGGTAGTGACAGCAAGACC 1740  
 561 T K I Y Y R K R I K V T Y S G S D S K T 580

repeat 1→

1741 TACGATGGTAACCCAGCTAACTTCGAGCCAACGACAGTTCAGTGGAGTGGCTTGAAAAGGA 1800  
 581 Y D G N P A N F E P T T V O W S G L K G 600

1801 CTGAACACTTCAACCTTAACGTCCGCTGACTTCACGTGGAATACTGCGGATAAGAAGGCA 1860  
 601 L N T S T L T S A D F T W N T A D K K A 620

1861 CCAACGGATGCCGGTAAGTACACACTTAGTTTGAATACGACCGGAGAAGCAGCCTTACGT 1920  
 621 P T D A G K Y T L S L N T T G E A A L R 640

1921 AAGGCTAACCCGAACCTATGATCTCAAGACAATTAGCGGTAGTTACACCTACACGATTAAT 1980  
 641 K A N P N Y D L K T I S G S Y T Y T I N 660

1981 CCACTAGGGATTGATAAAGTTACCTATAGTGGTAGTGACAGCAAGACCTACGATGGTAAC 2040  
 661 P L G I D K V T Y S G S D S K T Y D G N 680

repeat 2→

2041 CCAGCTAACTTCGAGCCAACGACAGTTCAGTGGAGTGGCTTGAAAGGACTGAACACTTCA 2100  
 681 P A N F E P T T V O W S G L K G L N T S 700

2101 ACCTTAACGTCCGCTGACTTCACGTGGAATACTGCGGATAAGAAGGCACCAACGGATGCC 2160  
 701 T L T S A D F T W N T A D K K A P T D A 720

2161 GGTAAGTACACACTTAGTTTGAATACGACCGGAGAAGCAGCCTTACGTAAGGCTAACCCG 2220  
 721 G K Y T L S L N T T G E A A L R K A N P 740

2221 AACTATGATCTCAAGACAATTAGCGGTAGTTACACCTACACGATTAATCCACTAGGGATT 2280  
 741 N Y D L K T I S G S Y T Y T I N P L G I 760

2281 GATAAAGTTACCTATAGTGGTAGTGACAGCAAGACCTACGATGGTAACCCAGCTAACTTC 2340  
 761 D K V T Y S G S D S K T Y D G N P A N F 780

repeat 3→

2341 GAGCCAACGACAGTTCAGTGGAGTGGCTTGAAAGGACTGAACACTTCAACCTTAACGTCC 2400  
 781 E P T T V O W S G L K G L N T S T L T S 800

2401 GCTGACTTCACGTGGAATACTGCGGATAAGAAGGCACCAACGGATGCCGGTAAGTACACA 2460  
 801 A D F T W N T A D K K A P T D A G K Y T 820

2461 CTTAGTTTGAATACGACCGGAGAAGCAGCCTTACGTAAGGCTAACCCGAACCTATGATCTC 2520  
 821 L S L N T T G E A A L R K A N P N Y D L 840

2521 AAGACAATTAGCGGTAGTTACACCTACACGATTAATCCACTAGGGATTGTGACTGTAAT 2580  
 841 K T I S G S Y T Y T I N P L G I V T V N 860

```

2581 TACAAGGGCTATGATAAGAAAGTCTATGATGGTCAACCTGGAACGATTAATCCGGGTAAA 2640
861 Y K G Y D K K V Y D G Q P G T I N P G K 880

2641 TTAACGTGGAGTAAGTTGCCAGATGGTACTTCATTGAAGATGCCAACATGGAGTATAGAT 2700
881 L T W S K L P D G T S L K M P T W S I D 900

2701 GATTTTCGCTTGGGAAACAGCTGATGGCTTAGCACCAACGGCAGTAGGAACTTATCGGATT 2760
901 D F A W E T A D G L A P T A V G T Y R I 920

2761 ATCTTGACGGATGCTGGTAAGGCTGCCTAAAGAAGATTAATCCAAATTATGACTTAAGC 2820
921 I L T D A G K A A L K K I N P N Y D L S 940

2821 AGTATTACTGGTGTCTTTACTTATGAAATTAAGCCAGCACAGACACCAGAAATCTTAGGC 2880
941 S I T G V F T Y E I K P A Q T P E I L G 960

2881 CAAACACCTGAGCAACAACCAGGCCAAAATACTAATCAATCAGGAGCTGAAAACGGCTTT 2940
961 Q T P E Q Q P G Q N T N Q S G A E N G F 980

2941 GGTTCTTCTACAAGGCCTAATGCATCAACTAACTCCAATCTTAATCAACTTCCACAGACT 3000
981 G S S T R P N A S T N S N L N Q L P Q T 1000

3001 GGTAATGAGCATTCTAATACTGCACTTGCTGGTCTAGCATTGGCTTTCTTGACTGCTATG 3060
1001 G N E H S N T A...L...A...G...L...A...L...A...F...L...T...A...M 1020

3061 CTTGGTTTGGGCAAGAAGCGTAAACATGATTAGttattctaaagcttagtagattttaa 3090
1021 L...G...L...G K K R K H D * 1030

agctatgtagtggtttcgtaattggttgagaaagagattagtgcttcgtcaagaagtactg
atgagaaaatagaataagttttcaagcagctcgtgctggaatttggcatgagctggttct

```

**Fig S1.** Nucleotide sequence and the deduced amino acid sequence of *cmbA* based on the draft genome sequence of *L. reuteri* ATCC PTA 6475 (GenBank: ACGX02000000). Features of the sequence are indicated as follows: underlined nucleotide sequence: putative promoter sequence (last nucleotide, position -60, predicted transcription start) and a predicted transcription termination sequence; dotted underlined nucleotide sequence: consensus Shine Dalgarno sequence; nucleotides in bold at positions 4 and 1221: these Cs were changed to Gs in the cloned gene to introduce and remove *NcoI* sites, respectively (see main text for details); amino acid sequence in bold: YSIRK-G/S like motif in signal sequence; underlined amino acid sequence: the cell wall anchoring motif LPXTG; dotted underlined amino acid sequence: membrane spanning domain; double underlined amino acid sequence: positively charged tail (membrane anchoring). The signal sequence and the tandem repeats are indicated under the amino acid sequence. Greyed out region represents the sequence missing in the cloned *cmbA* obtained in this study.

(Promoter predicted by: Neural Network Promoter Prediction,

[http://www.fruitfly.org/seq\\_tools/promoter.html](http://www.fruitfly.org/seq_tools/promoter.html); Transcription terminator predicted by:

ARNold, <http://rna.igmors.u-psud.fr/toolbox/arnold/>; Signal sequence predicted by: SignalP

4.1 Server, <http://www.cbs.dtu.dk/services/SignalP/>)

## Supplementary material, Table S1

Mutagenesis scheme for putative surface protein genes and sortase gene in *L. reuteri* 6475. All mutations were done by creating a stop codon early in the genes (leading to truncated proteins of a size 15% or less of the full proteins). The sites for the mutations were generally chosen based on the ease of creating a suitable restriction site used in the screening. Mutants were verified with sequencing. For details of the procedure, see van Pijkeren & Britton (2012).

**Table S1.** Mutation of putative surface protein genes and sortase gene in *L. reuteri* 6475.

| Locus tag<br>HMPREF0536 | Designation  | Amino acid<br>change      | Recombineering oligo <sup>a</sup><br>(5' -> 3')                                                                   | Screen oligo#1<br>(5' -> 3')       | Screen oligo#2<br>(5' -> 3')       | Screen oligo#3<br>(5' -> 3')       |
|-------------------------|--------------|---------------------------|-------------------------------------------------------------------------------------------------------------------|------------------------------------|------------------------------------|------------------------------------|
| 10633                   | <i>cmbA</i>  | (I35X), (G36I)            | tactattaagaaattaactggtgggggt<br>tacttcgggtatta <b>TGAAT</b> tctatcctt<br>tatgggagaactagaaggggatagcgt<br>tcatgcgga | gcaaactcaaaatat<br>gaagaagctatagaa | ctagttctcccataa<br>aggatagaattca   | NA <sup>b</sup>                    |
| 10255                   | <i>srtA</i>  | (V26X)                    | tccctactaagtaagacttaatctggt<br>ggttaaaaattaa <b>CTA</b> actgatacca<br>gtaacagtacaacaaccgctgtccacc<br>gt           | ttgtactgttactgg<br>tatcagtttag     | actttacaaaatcag<br>aaaacatttgcgt   | atcgattaataccat<br>tggagcaattac    |
| 10146                   | <i>10146</i> | (A88X), (D89I)            | tctttcgtttggtttaacttgattctta<br>ttagaatcgacattttga <b>ATTCA</b> gtct<br>gccaaattttgattagcaatattaaga<br>tcattat    | aacgaatgggattaa<br>agattagtttcaatg | attcttattagaatc<br>gacattttgaattca | NA                                 |
| 11993                   | <i>11993</i> | (Y51X), (A52I)            | gattgcaattgtgcaagttgctgatca<br>gcagttgcccgaacttg <b>AATTC</b> aagta<br>acttggtcattacttacttgtgcatta<br>ttttgacta   | gttgcaagagatgct<br>tcagcat         | caagtaagtaatgac<br>caagttacttgaatt | cgtgggaacaggttt<br>gaaaaattttaaatt |
| 10154                   | <i>10154</i> | (Y70X), (Q71A),<br>(N72Y) | ccatgcaggtcattgattcctaaaatc<br>tgaactggaatgtcat <b>AAGCT</b> tatttg<br>gctaggtcagaccaatcagtagtcggt<br>tgccggagta  | tgggatattaacggt<br>gagtggtaaat     | taaaatctgaactgg<br>aatgtcataagct   | agtatggttgcattc<br>caaatgggatt     |
| 10802                   | <i>10802</i> | (D73E), (Q74A),<br>(Q75X) | atTTTTgatatgtatcattaactaac<br>tgTTgactatcgattt <b>AAGCT</b> tcttta<br>acttGttgtgcagttacaagagctgat<br>tgattttca    | acaagacaaaatgga<br>ttgctatgtgg     | ttcttaaggaaccac<br>cagcatcattt     | NA                                 |

<sup>a</sup> mutated bases are in bold uppercase; <sup>b</sup> NA, not applicable

## Supplementary material, Table S2

**Table S2.** Primer/probes used in this study

| Name                                           | Direction          | Oligonucleotide primer sequence                                |
|------------------------------------------------|--------------------|----------------------------------------------------------------|
| <b>Primers used for cloning of <i>cmbA</i></b> |                    |                                                                |
| <i>cmbA-f1</i>                                 | Forward start      | 5'-ATGCACCATGGTATCAAGAAAAAATTATAAGGAAAC-3'                     |
| <i>cmbA-f2</i>                                 | Forward middle     | 5'-<br>ATCTTCAAAATCCTAATGTGGCGTCGATGGGAACTCTTTCCCA<br>ATTTG-3' |
| <i>cmbA-r1</i>                                 | Reverse middle     | 5'-GACGCCACATTAGGATTTTGA-3'                                    |
| <i>cmbA-r2</i>                                 | Reverse end        | 5'-ATGCATCTAGACTAATCATGTTTACGCTTC-3'                           |
| <b>Primers used for sequencing</b>             |                    |                                                                |
| <i>cmbA-seqf1</i>                              | Forward (1)        | 5'-CTCCACAACCTCTATTTGCAA-3'                                    |
| <i>cmbA-seqf2</i>                              | Forward (2)        | 5'-GTGACTTTCAATATGTAATATTAA-3'                                 |
| <i>cmbA-seqf3</i>                              | Forward (3)        | 5'-GTCGATGGGAACTCTTTCC- 3'                                     |
| <i>cmbA-seqf4</i>                              | Forward (4)        | 5'-GGGCTATGATAAGAAAGTCTA-3'                                    |
| <i>cmbA-seqr3</i>                              | Reverse            | 5'CGTTCCAGGTTGACCATCA-3'                                       |
| Sip3                                           | pSIP411<br>forward | 5'-GTCTAAGGAATTGTCAGATAGGC-3'                                  |
| Sip16                                          | pSIP411 reverse    | 5'-ATTAGTCTCGGACATTCTGC-3'                                     |
| <b>Primer/Probe used for real-time PCR</b>     |                    |                                                                |
| <i>CmbA (lar_0958)</i>                         | Forward            | 5'-ATCCAAACTGTGGCGATGTG-3'                                     |
| <i>CmbA (lar_0958)</i>                         | Reverse            | 5'-AAGCTGTCCGCTAGCATCCA-3'                                     |
| <i>CmbA (lar_0958)</i>                         | Probe <sup>1</sup> | 6FAM-ATGGGCCATTATTTG-MGBNFQ                                    |
| <i>SecY (lr_0469)</i>                          | Forward            | 5'-CCGCGTTTTGTTGAATGGA-3'                                      |
| <i>SecY (lr_0469)</i>                          | Reverse            | 5'-TCGGGTTGCTTGATTAAGTTTTC-3'                                  |
| <i>SecY (lr_0469)</i>                          | Probe <sup>1</sup> | 6FAM-TAAACAAGGAGAAGTAGGACGG-MGBNFQ                             |

<sup>1</sup>Taq probes, 6-FAM (6-carboxyfluorescein), MGB (6-carboxytetramethylrhodamine).

**Supplementary material, Table S3****Table S3.** Expression of *cmbA* (qRT-PCR)

| Strain                                                                                                   | Fold change <sup>a</sup><br>Mean | Fold change <sup>a</sup><br>SD |
|----------------------------------------------------------------------------------------------------------|----------------------------------|--------------------------------|
| 6475(pSIP- <i>cmbA</i> ) vs 6475(pSIPΔ) <sup>b</sup>                                                     | 355.9                            | 88.2                           |
| 6475 <i>cmbA</i> <sup>-</sup> (pSIP- <i>cmbA</i> ) vs 6475 <i>cmbA</i> <sup>-</sup> (pSIPΔ) <sup>b</sup> | 456.2                            | 179.2                          |
| 6475 <i>cmbA</i> <sup>-</sup> (pSIP- <i>cmbA</i> ) vs 6475(pSIP- <i>cmbA</i> ) <sup>b</sup>              | 0.9                              | 0.1                            |

<sup>a</sup>Fold change in *cmbA* expression was calculated by the  $\Delta\Delta C_T$  method ( $2^{-\Delta\Delta C_T}$ ). The presented values are mean $\pm$ SD from two independent experiments.

<sup>b</sup>Comparison of SppIP induced cultures

**Quantitative real-time reverse transcription PCR of *cmbA* expression**

*cmbA* gene expression was determined by quantitative real-time reverse transcription PCR (qRT-PCR) in samples from Caco-2 adhesion assay to determine chromosomal and vector expression of *cmbA*. At the start of the Caco-2 adhesion experiments, an aliquot of the bacteria culture was mixed with RNA protect Bacteria Reagent (Qiagen) and frozen at -80 °C until RNA isolation. Purification and extraction of total RNA was done using the RNeasy Mini kit (Qiagen) according to manufacturer's instructions. NanoDrop was used to test the quality of RNA, and only samples with satisfactory quality were used for qRT-PCR. The qRT-PCR was performed as described previously (Rode *et al.*, 2007) using primers and Taqman® probes designed with Primer Express® Software v3.0 (Applied Biosystem) (primer and probes are listed in Table S1). The target site of the *cmbA* primer and probe set was upstream of the *cmbA* nonsense mutation. Relative gene expression was calculated by the  $\Delta C_T$  method, using *secY* as the endogenous reference gene (Wall *et al.*, 2007). There was no difference in the amplification efficiencies of *cmbA* and *secY*. Fold change in gene expression was calculated using the  $\Delta\Delta C_T$  method ( $2^{-\Delta\Delta C_T}$ ) (Livak & Schmittgen, 2001).



## References

**Livak, K. J. & Schmittgen, T. D. (2001).** Analysis of relative gene expression data using real-time quantitative PCR and the 2(-Delta Delta C(T)) Method. *Methods* **25**, 402-408.

**Rode, T. M., Langsrud, S., Holck, A. & Moretro, T. (2007).** Different patterns of biofilm formation in *Staphylococcus aureus* under food-related stress conditions. *Int J Food Microbiol* **116**, 372-383.

**van Pijkeren, J. P. & Britton, R. A. (2012).** High efficiency recombineering in lactic acid bacteria. *Nucl Acids Res* **40**, e76.

**Wall, T., Bath, K., Britton, R. A., Jonsson, H., Versalovic, J. & Roos, S. (2007).** The early response to acid shock in *Lactobacillus reuteri* involves the ClpL chaperone and a putative cell wall-altering esterase. *Appl Environ Microbiol* **73**, 3924-3935.
